# Supplementary material
Source: Springer Nature journal article supplement (https://www.springermedizin.de/resource/supplementary/12955_2006_313_MOESM2_ESM.pdf/9560134)

Item A  
Item B  
Item C

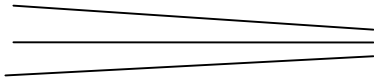

Domain  
Score 1

Item D  
Item E  
Item F  
Item G

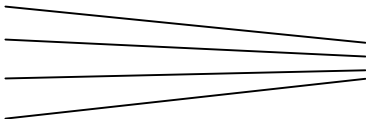

Domain  
Score 2

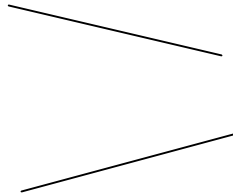

Overall  
Score

Supplement: MOESM2 [file 9560134]
